# Supplementary material for: Effect of alcohol consumption and the presence of fatty liver on the risk for incident type 2 diabetes: a population-based longitudinal study
Source: PubMed Central journal article supplement — BMJ Open Diabetes Res Care. 2020 Sep 7;8(1):e001629. doi: 10.1136/bmjdrc-2020-001629 (PMC7478020; doi:10.1136/bmjdrc-2020-001629), 2020-09-07
Supplement: bmjdrc-2020-001629supp001.pdf [file bmjdrc-2020-001629supp001.pdf]

**Supplementary Table 1.** Proportional hazards

|                         | rho       | chisq   | p     |
|-------------------------|-----------|---------|-------|
| Age, yrs                | 0.00823   | 0.763   | 0.382 |
| BMI, kg/m <sup>2</sup>  | -0.034526 | 0.02431 | 0.876 |
| Waist circumference, cm | 0.00314   | 0.0929  | 0.760 |
| Non-smoker              | -         | -       | -     |
| Ex-smoker               | 0.00735   | 0.506   | 0.477 |
| Current smoker          | 0.01180   | 1.299   | 0.254 |
| Exercise habit          | 0.00562   | 0.355   | 0.551 |
| SBP, mmHg               | -0.00485  | 0.212   | 0.645 |
| HbA1c, mmol/l           | -0.02585  | 0.5643  | 0.175 |
| TG, mmol/l              | 0.00855   | 0.825   | 0.364 |
| ALT, IU/l               | 0.019379  | 3.95269 | 0.065 |
| FL-/non                 | -         | -       | -     |
| FL-/light               | 0.000846  | 0.00665 | 0.935 |
| FL-/moderate            | -0.008951 | 0.74481 | 0.388 |
| FL-/heavy               | -0.002371 | 1.22795 | 0.222 |
| FL+/non                 | 0.011212  | 1.16993 | 0.279 |
| FL+/light               | -0.006574 | 0.40188 | 0.526 |
| FL+/moderate            | -0.011603 | 1.25123 | 0.263 |
| FL+/heavy               | -0.005018 | 0.23408 | 0.629 |

ALT: alanine transaminase, BMI: body mass index, FL: fatty liver, HbA1c: hemoglobin A1c, SBP: systolic blood pressure, TG: triglycerides.

**Supplementary Table 2.** Characteristic of participants in the phenotype groups

| (Fatty liver/non, light, moderate, heavy alcohol consumer) | FL-/non | FL-/light | FL-/moderate | FL-/heavy | FL+/non    | FL+/light   | FL+/moderate       | FL+/heavy              |
|------------------------------------------------------------|---------|-----------|--------------|-----------|------------|-------------|--------------------|------------------------|
| Age, yrs                                                   | -       | †         | †, ‡         | †, ‡      | †, ‡, §, ¶ | †           | †, ‡,              | †,                     |
| Body weight, kg                                            | -       | -         | -            | -         | †, ‡, §, ¶ | †, ‡, §, ¶  | †, ‡, §, ¶         | †, ‡, §, ¶             |
| BMI, kg/m <sup>2</sup>                                     | -       | -         | †            | †         | †, ‡, §, ¶ | †, ‡, §, ¶, | †, ‡, §, ¶         | †, ‡, §, ¶             |
| Waist circumference., cm                                   | -       | †         | †            | †, ‡      | †, ‡, §, ¶ | †, ‡, §, ¶  | †, ‡, §, ¶         | †, ‡, §, ¶             |
| Alcohol consumption, g/week                                | -       | †         | †, ‡         | †, ‡, §   | ‡, §, ¶    | †, ‡, ¶,    | †, ‡, ¶,   , **    | †, ‡, §,   , **, ††    |
| Fasting plasma glucose, mmol/L                             | -       | †         | †            | †, ‡      | †, ‡, §, ¶ | †, ‡, §, ¶  | †, ‡, §, ¶,        | †, ‡, §, ¶,   , **     |
| HbA1c, mmol/mol                                            | -       | -         | †            | †         | †, ‡, §, ¶ | †, ‡, §, ¶  | †, ‡, §, ¶,        | †, ‡, §, ¶,            |
| Triglycerides, mmol/L                                      | -       | -         | †            | †, ‡, §   | †, ‡, §, ¶ | †, ‡, §, ¶  | †, ‡, §, ¶,   , ** | †, ‡, §, ¶,   , **     |
| Total cholesterol, mmol/L                                  | -       | -         | -            | -         | †, ‡, §, ¶ | †, ‡, §, ¶  | †, ‡, §, ¶         | †, ‡, §, ¶             |
| HDL cholesterol, mmol/L                                    | -       | †         | †, ‡         | †, ‡, §   | †, ‡, §, ¶ | †, ‡, §, ¶  | †, ‡, §, ¶,        | †, ‡, §, ¶             |
| AST, IU/L                                                  | -       | -         | †, ‡         | †, ‡, §   | †, ‡, §, ¶ | †, ‡, §, ¶  | †, ‡, §, ¶         | †, ‡, §, ¶,   , **, †† |
| ALT, IU/L                                                  | -       | -         | -            | †, ‡      | †, ‡, §, ¶ | †, ‡, §, ¶  | †, ‡, §, ¶,        | †, ‡, §, ¶,            |
| GGT, IU/L                                                  | -       | †         | †, ‡         | †, ‡, §   | †, ‡, ¶    | †, ‡, §,    | †, ‡, §,           | †, ‡, §, ¶,   , **, †† |
| SBP, mmHg                                                  | -       | †         | †, ‡         | †, ‡, §   | †, ‡, §    | †, ‡, §, ¶  | †, ‡, §, ¶         | †, ‡, §, ¶             |
| DBP, mmHg                                                  | -       | †         | †, ‡         | †, ‡, §   | †, ‡, §    | †, ‡, §, ¶, | †, ‡, §, ¶,        | †, ‡, §, ¶,            |

Data are expressed as the number (%) of subjects or mean (SD). The analyses of continuous variables among eight groups were performed by Tukey HSD test: †, p<0.05 versus FL-/non; ‡, p<0.05 versus FL-/light; §, p<0.05 versus FL-/moderate; ¶, p<0.05 versus FL-/heavy; ||, p<0.05 versus FL+/non; \*\*, p<0.05 versus FL+/light; ††, p<0.05 versus FL+/heavy.
