# Supplementary material for: Effect of alcohol consumption and the presence of fatty liver on the risk for incident type 2 diabetes: a population-based longitudinal study
Source: PubMed Central journal article supplement — BMJ Open Diabetes Res Care. 2020 Sep 7;8(1):e001629. doi: 10.1136/bmjdrc-2020-001629 (PMC7478020; doi:10.1136/bmjdrc-2020-001629), 2020-09-07
Supplement: bmjdrc-2020-001629supp002.pdf [file bmjdrc-2020-001629supp002.pdf]

# Supplementary Fig. 1

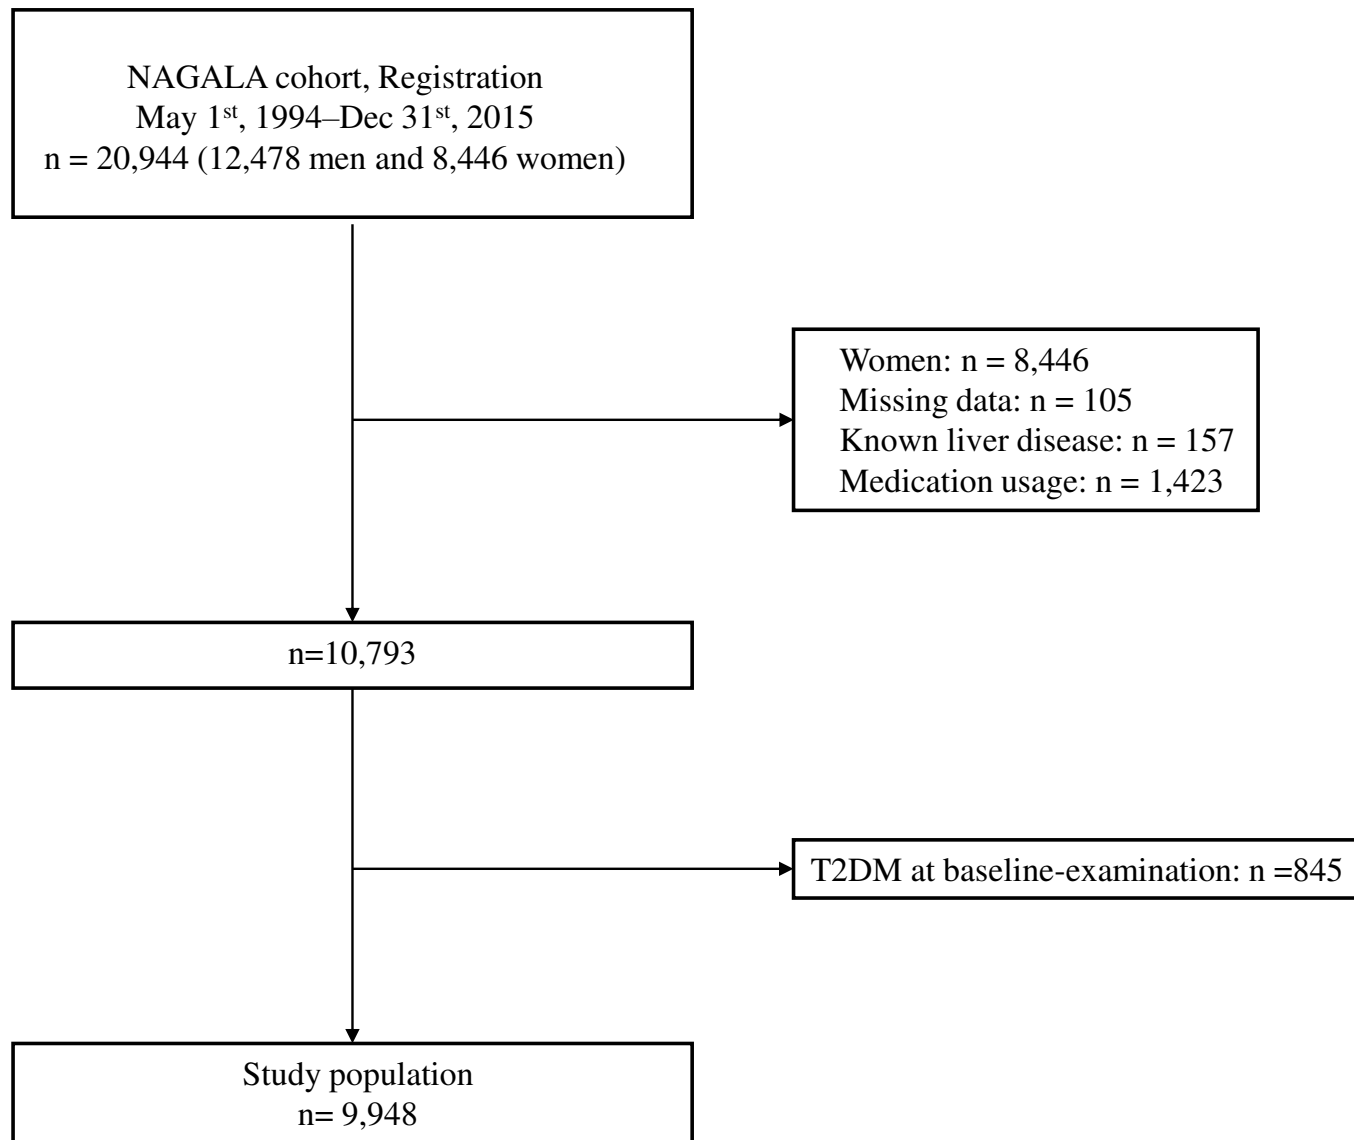

## Supplementary Fig. 2a

|                                                 |                                                 |                                                 |                                                 |                                                 |                                                 |                                                 |                                          |
|-------------------------------------------------|-------------------------------------------------|-------------------------------------------------|-------------------------------------------------|-------------------------------------------------|-------------------------------------------------|-------------------------------------------------|------------------------------------------|
| <b>1: FL-/non-</b><br>80/2,663<br>(3.0%)        |                                                 |                                                 |                                                 |                                                 |                                                 |                                                 |                                          |
| 2 vs. 1<br>0.97 (0.63–1.48)<br><i>p</i> = 0.886 | <b>2: FL-/light</b><br>30/890<br>(3.4%)         |                                                 |                                                 |                                                 |                                                 |                                                 |                                          |
| 3 vs. 1<br>1.76 (1.20–2.58)<br><i>p</i> = 0.005 | 3 vs. 2<br>1.82 (1.13–2.92)<br><i>p</i> = 0.013 | <b>3: FL-/moderate</b><br>42/641<br>(5.2%)      |                                                 |                                                 |                                                 |                                                 |                                          |
| 4 vs. 1<br>2.02 (1.38–2.96)<br><i>p</i> < 0.001 | 4 vs. 2<br>2.08 (1.30–3.34)<br><i>P</i> = 0.002 | 4 vs. 3<br>1.14 (0.74–1.77)<br><i>p</i> = 0.536 | <b>4: FL-/ heavy</b><br>42/641<br>(6.6%)        |                                                 |                                                 |                                                 |                                          |
| 5 vs. 1<br>1.94 (1.44–2.60)<br><i>p</i> < 0.001 | 5 vs. 2<br>2.00 (1.33–2.99)<br><i>p</i> < 0.001 | 5 vs. 3<br>1.10 (0.76–1.59)<br><i>p</i> = 0.608 | 5 vs. 4<br>0.96 (0.67–1.37)<br><i>p</i> = 0.815 | <b>5: FL+/non-</b><br>195/1,313<br>(14.9%)      |                                                 |                                                 |                                          |
| 6 vs. 1<br>2.44 (1.63–3.64)<br><i>p</i> < 0.001 | 6 vs. 2<br>2.52 (1.55–4.08)<br><i>p</i> < 0.001 | 6 vs. 3<br>1.38 (0.88–2.18)<br><i>p</i> = 0.158 | 6 vs. 4<br>1.21 (0.77–1.88)<br><i>p</i> = 0.408 | 6 vs. 5<br>1.26 (0.90–1.76)<br><i>p</i> = 0.189 | <b>6: FL+/light</b><br>43/265<br>(16.2%)        |                                                 |                                          |
| 7 vs. 1<br>1.65 (1.04–2.60)<br><i>p</i> = 0.014 | 7 vs. 2<br>1.70 (0.99–2.89)<br><i>p</i> = 0.053 | 7 vs. 3<br>0.94 (0.57–1.54)<br><i>p</i> = 0.794 | 7 vs. 4<br>0.82 (0.50–1.34)<br><i>p</i> = 0.416 | 7 vs. 5<br>0.85 (0.56–1.28)<br><i>p</i> = 0.431 | 7 vs. 6<br>0.68 (0.42–1.10)<br><i>p</i> = 0.108 | <b>7: FL+/moderate</b><br>27/239<br>(11.3%)     |                                          |
| 8 vs. 1<br>2.92 (1.88–4.53)<br><i>p</i> < 0.001 | 8 vs. 2<br>3.01 (1.79–5.05)<br><i>p</i> < 0.001 | 8 vs. 3<br>1.66 (1.02–2.69)<br><i>p</i> = 0.044 | 8 vs. 4<br>1.44 (0.90–2.33)<br><i>p</i> = 0.136 | 8 vs. 5<br>1.51 (1.03–2.20)<br><i>p</i> = 0.043 | 8 vs. 6<br>1.20 (0.75–1.90)<br><i>p</i> = 0.449 | 8 vs. 7<br>1.77 (1.06–2.96)<br><i>p</i> = 0.030 | <b>8: FL+/heavy</b><br>32/193<br>(16.6%) |

## Supplementary Fig. 2b

|                                                  |                                                   |                                                  |                                                  |                                                 |                                                  |                                                 |                                        |
|--------------------------------------------------|---------------------------------------------------|--------------------------------------------------|--------------------------------------------------|-------------------------------------------------|--------------------------------------------------|-------------------------------------------------|----------------------------------------|
| <b>1: FL-/non-</b><br>11/1,331<br>(0.8%)         |                                                   |                                                  |                                                  |                                                 |                                                  |                                                 |                                        |
| 2 vs. 1<br>0.68 (0.15–3.09)<br><i>p</i> = 0.604  | <b>2: FL-/light</b><br>2/299<br>(0.7%)            |                                                  |                                                  |                                                 |                                                  |                                                 |                                        |
| 3 vs. 1<br>2.08 (0.65–6.66)<br><i>p</i> = 0.246  | 3 vs. 2<br>3.05 (0.55–16.80)<br><i>p</i> = 0.013  | <b>3: FL-/moderate</b><br>4/269<br>(1.5%)        |                                                  |                                                 |                                                  |                                                 |                                        |
| 4 vs. 1<br>2.66 (0.88–8.09)<br><i>p</i> = 0.104  | 4 vs. 2<br>3.91 (0.74–20.68)<br><i>p</i> = 0.089  | 4 vs. 3<br>1.28 (0.34–4.90)<br><i>p</i> = 0.716  | <b>4: FL-/ heavy</b><br>5/180<br>(2.8%)          |                                                 |                                                  |                                                 |                                        |
| 5 vs. 1<br>2.74 (1.26–5.95)<br><i>p</i> = 0.008  | 5 vs. 2<br>4.02 (0.93–17.36)<br><i>p</i> < 0.001  | 5 vs. 3<br>1.32 (0.44–3.96)<br><i>p</i> = 0.612  | 5 vs. 4<br>1.02 (0.37–2.84)<br><i>p</i> = 0.956  | <b>5: FL+/non-</b><br>36/590<br>(6.1%)          |                                                  |                                                 |                                        |
| 6 vs. 1<br>2.30 (0.58-9.14)<br><i>p</i> = 0.266  | 6 vs. 2<br>3.38 (0.53–21.46)<br><i>p</i> = 0.192  | 6 vs. 3<br>1.11 (0.23–5.38)<br><i>p</i> = 0.899  | 6 vs. 4<br>0.86 (0.19–3.97)<br><i>p</i> = 0.851  | 6 vs. 5<br>0.84 (0.25-2.80)<br><i>p</i> = 0.773 | <b>6: FL+/light</b><br>4/66<br>(6.1%)            |                                                 |                                        |
| 7 vs. 1<br>3.57 (0.55–13.49)<br><i>p</i> = 0.014 | 7 vs. 2<br>5.24 (0.85–32.34)<br><i>p</i> = 0.074  | 7 vs. 3<br>1.72 (0.37–7.94)<br><i>p</i> = 0.495  | 7 vs. 4<br>1.34 (0.31–5.87)<br><i>p</i> = 0.701  | 7 vs. 5<br>1.30 (0.39-4.33)<br><i>p</i> = 0.601 | 7 vs. 6<br>1.55 (0.30-7.96)<br><i>p</i> = 0.601  | <b>7: FL+/moderate</b><br>3/70<br>(4.3%)        |                                        |
| 8 vs. 1<br>9.38 (3.49-25.20)<br><i>p</i> < 0.001 | 8 vs. 2<br>13.75 (2.84–66.78)<br><i>p</i> < 0.001 | 8 vs. 3<br>4.51 (1.31–15.55)<br><i>p</i> = 0.012 | 8 vs. 4<br>3.52 (1.11–11.18)<br><i>p</i> = 0.028 | 8 vs. 5<br>3.42 (1.51–7.74)<br><i>p</i> = 0.007 | 8 vs. 6<br>4.07 (1.04-15.98)<br><i>p</i> = 0.031 | 8 vs. 7<br>2.63 (0.69-9.98)<br><i>p</i> = 0.133 | <b>8: FL+/heavy</b><br>9/84<br>(10.7%) |
