# Supplementary material for: Effect of alcohol consumption and the presence of fatty liver on the risk for incident type 2 diabetes: a population-based longitudinal study
Source: PubMed Central journal article supplement — BMJ Open Diabetes Res Care. 2020 Sep 7;8(1):e001629. doi: 10.1136/bmjdrc-2020-001629 (PMC7478020; doi:10.1136/bmjdrc-2020-001629), 2020-09-07
Supplement: bmjdrc-2020-001629supp003.pdf [file bmjdrc-2020-001629supp003.pdf]

**Supplementary Figure 1. Participant registration.** NAGALA, NAfld in Gifu Area, Longitudinal Analysis; CKD, chronic kidney disease.

**Supplementary Figure 2-A. Hazard ratios and 95% confidence intervals for incident type 2 diabetes in the former half (2-A) and latter half (2-B).**

The numbers below each group indicates the number of participants developed type 2 diabetes / participants classified in each group (percentage). The hazard ratios and 95% confidence intervals were calculated adjusting for age, body mass index, waist circumference, smoking status, exercise, hemoglobin A1c, triglycerides and alanine transaminase at baseline.

Non-: none or minimal.
